# Supplementary material for: A temporal shift of the evolutionary principle shaping intratumor heterogeneity in colorectal cancer
Source: PubMed Central journal article supplement (PMC6056524; doi:10.1038/s41467-018-05226-0), 2018-07-23
Supplement: 41467_2018_5226_MOESM2_ESM.pdf [file 41467_2018_5226_MOESM2_ESM.pdf]

## **Description of Additional Supplementary Files**

File Name: Supplementary Data 1

Description: Detailed information of cases and samples.

File Name: Supplementary Data 2

Description: Information of 63 analysed samples.

File Name: Supplementary Data 3

Description: Information of all somatic mutations.
